# Supplementary material for: New records of bats (Chiroptera) in the Atlantic Forest of Espírito Santo, southeastern Brazil
Source: publisher site journal article supplement (doi:10.1515/mammalia-2019-0109), 2020-08-31
Supplement: Supplementary file 1 [file j_mammalia-2019-0109_suppl_002.docx]

**Supplementary Material; DOI 10.1515/mammalia-2019-0109**

**Supplementary Material 2:** List of references of all seven species cited in this study.

Acosta y Lara, E.F. 1951. Notas ecológicas sobre algunos quirópteros del Brasil. Com. Zool. Mus. Montevideo 3: 1–2.

Aguiar, L.M. de S. and Y. Antonini. 2016. Prevalence and intensity of Streblidae in bats from a Neotropical savanna region in Brazil. Folia Parasitologica 63: 1–8.

Aguiar, L.M. de S., W.R. Camargo and A. de S. Portella. 2006. Occurrence of white-winged vampire bat, *Diaemus youngi* (Mammalia, Chiroptera), in the Cerrado of Distrito Federal, Brazil. Rev. Bras. Zool.Rev. Bras. Zool. 23: 893–896.

Aguiar, L.M. de S., M. Zortéa and V.A. Taddei. 1995. New records of bats for the Brazilian Atlantic Forest. Mammalia 59: 667–671.

Almeida, M.F., L.F.A. Martorelli, M.M. Sodré, A.P. de A.G. Kataoka, A.R. Rosa, M.L. Oliveira and E.A. da C. Aguiar. 2011. Rabies diagnosis and serology in bats from the State of Sao Paulo, Brazil. Rev. Soc. Bras. Med. Trop. 44: 140–145.

Alurralde, S.G., M.F.L. Berrizbeitia, R.M. Barquez and M.M. Díaz. 2016. Diversity and richness of small mammals at a well-conserved site of the Yungas in Jujuy Province, Argentina. Mammalia 80: 253–262.

Álvarez, T. and S.T. Álvarez-Castañeda. 1990. Cuatro nuevos registros de Murciélagos (Chiroptera) para el estado de Chiapas. Anales Escuela Nacional Ciencias Biológicas 33: 157–162.

Amorim, A.F., R.A. Silva and N.M. Silva. 1970. Isolamento do vírus rábico de morcego insetívoro, *Histiotus velatus*, capturado no estado de Santa Catarina. Pesq. Agropec. Bras. 5: 433–435.

Anderson, S., K.F. Koopman and G.K. Creighton. 1982. Bats of Bolivia: An annotated checklist. Am. Mus. Novit.2750: 1–24.

Andrade, F.A.G., M.E.B. Fernandes, S.A. Marques-Aguiar and G.B. Lima. 2008. Comparison between the chiropteran fauna from terra firme and mangrove forests on the Bragança peninsula in Pará, Brazil. Stud Neotrop Fauna E. 43: 169–176.

Arroyo-Cabrales, J., O.J. Polaco, D.E. Wilson and A.L. Gardner. 2008. Nuevos registros de murciélagos para el estado de Nayarit, México. RMM 12: 141–162.

Ascorra, C.F., D.E. Wilson and A.L. Gardner. 1991. Geographic Distribution of *Micronycteris schmidtorum* Sanborn (Chiroptera: Phyllostomidae). Proc. Biol. Soc. Wash. 104: 351–355.

Azevedo, A.A., P.M. Linardi and M.T.Z. Coutinho. 2002. Acari ectoparasites of bats from Minas Gerais, Brazil. J. Med. Entomol. 39: 553–555.

Barnett, A.A., E.M. Sampaio, E.K. V. Kalko, R.L. Shapley, E.A. Fischer, G. Camargo and B. Rodríguez-Herrera. 2006. Bats of Jaú National Park, central Amazônia, Brazil. Acta Chiropterol 8: 103–128.

Barquez, R.M. 1984. Significativa extension del rango de distribucion de *Diaemus youngii* (Yentink, 1893) (Mammalia, Chiroptera, Phyllostomidae). Hist. Nat. 4: 67–68.

Barquez, R.M., M.S. Sánchez and M.L. Sandoval. 2011. Nuevos registros de murciélagos (Chiroptera) en el norte de Argentina. Mastozool. Neotrop. 18: 11–24.

Barros, J.H. da S., P.C. Romijn, C. Baptista, A.G. de S. Pinto and M. de F. Madeira. 2008. Relato de infecção natural de morcegos por flagelados tripanosomatideos em diferentes municípios do estado do Rio de Janeiro. Rev Soc Bras Med Trop 41: 683–685.

Bernard, E. 2001a. Vertical stratification of bat communities in primary forests of Central Amazon, Brazil. J. Trop. Ecol. 17: 115–126.

Bernard, E. 2001b. Species list of bats (Mammalia, Chiroptera) of Santarém area, Pará State, Brazil. Rev. Bras. Zool. .Rev. Bras. Zool.18: 455–463.

Bernard, E. 2002. Diet, activity and reproduction of bat species (Mammalia, Chiroptera) in Central Amazonia, Brazil. Rev. Bras. Zool. Rev. Bras. Zool.19: 173–188.

Bernard, E. and M.B. Fenton. 2002. Species diversity of bats (Mammalia: Chiroptera) in forest fragments, primary forests, and savannas in central Amazonia, Brazil. Can. J. Zool. 80: 1124–1140.

Bernardi, F., A.A. de B. Gomes, F.H. Ito, L.J. Richtzenhain, R.M. Soares, M.B. Heinemann, A. Cortez, S.M. Sakamoto and P.C. Maiorka. 2005. Biological and immunological studies of five Brazilian rabies virus isolates. Braz. J. Vet. Res. Anim. Sci. 42: 307–312.

Bernardi, I.P., J.M.D. Miranda, J. Sponchiado, E. Grotto, F.F. Jacomassa, E.M. Teixeira, S.H. Roani and F. de C. Passos. 2009. Morcegos de Frederico Westphalen, Rio Grande do Sul, Brasil (Mammalia: Chiroptera): riqueza e utilização de abrigos. Biota Neotrop. 9: 349–354.

Bertola, P.B., C.C. Aires, S.E. Favorito, G. Graciolli, M. Amaku and R. Pinto-Da-Rocha. 2005. Bat flies (Diptera: Streblidae, Nycteribiidae) parasitic on bats (Mammalia: Chiroptera) at Parque Estadual da Cantareira, São Paulo, Brazil: Parasitism rates and host-parasite associations. Mem Inst Oswaldo Cruz 100: 25–32.

Bobrowiec, P.E.D. 2012. A Chiroptera preliminary survey in the middle Madeira River region of Central Amazonia, Brazil. Mammalia 76: 277–283.

Bobrowiec, P.E.D., L. dos S. Rosa, J. Gazarini and T. Haugaasen. 2014. Phyllostomid Bat Assemblage Structure in Amazonian Flooded and Unflooded Forests. Biotropica 46: 312–321.

Bolzan, D.P., E.C. Lourenço, L. de M. Costa, J.L. Luz, T. Jordão-Nogueira, D. Dias, C.E.L. Esbérard and A.L. Peracchi. 2010. Morcegos da região da Costa Verde e adjacências, litoral sul do estado do Rio de Janeiro. Chiroptera Neotropical 16: 585–594.

Bordignon, M.O. and J.T. Shapiro. 2018. Bat diversity in the western Brazilian Pantanal. Mammalia 82: 256–265.

Bowles, J.B., J.B. Cope and E.A. Cope. 1979. Biological studies of selected Peruvian bats of Tingo María, Departamento de Huánuco. Trans. Kans. Acad. Sci. 82: 1–10.

Brennan, J.M. 1967. New records of chiggers from the West Indies. Studies on the Fauna of Curaçao and Other Caribbean Islands 24: 146–156.

Cademartori, C.V., C.S. Lima, R.V. Marques, C.M. Mendonça, T.C. Cabral, D.P. de S. Pires and D.G. Delagnese. 2010. Quiropterofauna registrada em um remanescente florestal do Domínio Mata Atlântica no Rio Grande do Sul, Brasil. V Encontro Brasileiro Para o Estudo de Quirópteros 54–56.

Carvalho, J.C.M. 1942. Note on the Association of the Tick, *Ornithodoros talaje* (Guerin-Meneville), with Bat Infestations in Human Dwellings in Brazil. J Parasitol. 28: 165.

Castilho, J.G., P. Carnieli, R. de N. Oliveira, W. de O. Fahl, R. Cavalcante, A.A. Santana, W.L.G.A. Rosa, M.L. Carrieri and I. Kotait. 2010. A comparative study of rabies virus isolates from hematophagous bats in Brazil. J. Wildl. Dis. 46: 1335–1339.

Castro, I.J. and F. Michalski. 2015. Bats of a varzea forest in the estuary of the Amazon River, state of Amapá, northern Brazil. Biota Neotrop.15: 1–8.

Castro-Arellano, I., S.J. Presley, L.N. Saldanha, M.R. Willig and J.M. Wunderle. 2007. Effects of reduced impact logging on bat biodiversity in terra firme forest of lowland Amazonia. Biol. Conserv. 138: 269–285.

Chaves, M.E., W. Uieda, C.E. Bolochio, C.A.I. Souza, D. de A. Braga, C.H. Ferreira, C.L. Firmo, R.G.G.C. Mariano, K.C.S. Oliveira, E.G. Santos and F.M. Costa. 2012. Bats (Mammalia: Chiroptera) from Guarulhos, state of São Paulo, Brasil. Check List 8: 1117–1121.

Cherem, J.J., P.C. Simões-Lopes, S.L. Althoff and M.E. Graipel. 2004. Lista dos mamíferos do estado de Santa Catarina, sul do Brasil. Mastozool. Neotrop. 11: 151–184.

Clarke, F.M. and P.A. Racey. 2003. Discovery of the Bartica bat *Glyphonycteris daviesi* (Chiroptera: Phyllostomidae) in Trinidad, West Indies. Acta Chiropterol. 5: 151–160.

Coelho, E.D.R., A.P. Paglia, A.B. Viana-Junior, L.A.D. Falcão and G.B. Ferreira. 2018. Species Richness, Abundance and Functional Diversity of a Bat Community along an Elevational Gradient in the Espinhaço Mountain Range, Southeastern Brazil. Acta Chiropterol. 20: 129–138.

Costa, L. de M. and C.E.L. Esbérard. 2011. *Desmodus rotundus* (Mammalia: Chiroptera) on the southern coast of Rio de Janeiro state, Brazil. Braz. J. Biol. 71: 739–746.

Costa, L. de M., D.M. Oliveira, A.F.P. Dias e Fernandes and C.E.L. Esbérard. 2008. Ocorrência de *Diaemus youngi* (Jentink 1893), Chiroptera, no estado do Rio de Janeiro. Biota Neotrop. 8: 217–220.

Cuervo Díaz, A., J.I. Hernández-Camacho and A. Cadena G. 1986. Lista actualizada de los mamiferos de Colombia. Anotaciones sobre su distribucion. Caldasia 15: 471–501.

Dias, D., S.S.P. Silva and A.L. Peracchi. 2003. Ocorrência de *Glyphonycteris sylvestris* Thomas (Chiroptera, Phyllostomidae) no Estado do Rio de Janeiro, sudeste do Brasil. Rev. Bras. Zool. 20: 365–366.

Dobson, G.E. 1878. Catalogue of the Chiroptera in the Collections of the British Museum. British Museum (Natural History), London, 1–567 p.

Esbérard, C.E.L. 2003. Diversidade de morcegos em área de Mata Atlântica regenerada no sudeste do Brasil. Rev. Bras. Zoo. 5: 189–204.

Esbérard, C.E.L., J.A. de O. Motta and C. Perigo. 2005. Morcegos cavernícolas da Área de Proteção Ambiental (APA) Nascentes do Rio Vermelho, Goiás. Rev. Bras. Zoo. 7: 311–325.

Escobedo-Cabrera, E., L. León-Paniagua and J. Arroyo-Cabrales. 2006. Geographic distribution and some taxonomic comments of *Micronycteris schmidtorum* Sanborn (Chiroptera: Phyllostomidae) in Mexico. Caribbean Journal of Science 42: 129–135.

Estrada-Villegas, S., T.K. Halczok, M. Tschapka, R.A. Page, S.D. Brändel and T. Hiller. 2018. Bats and their Bat Flies: Community Composition and Host Specificity on a Pacific Island Archipelago. Acta Chiropterol. 20: 161–176.

Falcão, F. de C. 2007. Mammalia, Chiroptera, Phyllostomidae, *Diaemus youngi*: First record for the state of Bahia, northeastern Brazil. Check List 3: 330–332.

Falcão, F. de C., B. Soares-Santos and S. Drummond. 2005. Espécies de morcegos do Planalto da Conquista, Bahia, Brasil. Chiroptera Neotropical 11: 220–223.

Faria, D.M. 2006. Phyllostomid bats of a fragmented landscape in the north-eastern Atlantic forest, Brazil. J. Trop. Ecol. 22: 531–542.

Faria, D.M., B. Soares-Santos and E.M. Sampaio. 2006. Bats from the Atlantic rainforest of southern Bahia, Brazil. Biota Neotrop. 6: 1–13.

Feijó, A., P. Araújo, M.P. de A. Fracasso and K.R.P. Santos. 2010. New records of three bat species for the Caatinga of the state of Paraíba, northeastern Brazil. Chiroptera Neotropical 16: 723–727.

Feijó, A., H.L. Nunes and A. Langguth. 2016. Mamíferos da Reserva Biológica Guaribas, Paraíba, Brasil. Revista Nordestina de Biologia 24: 57–74.

Feijó, A., P.A. Rocha and S.L. Althoff. 2015. New species of *Histiotus* (Chiroptera: Vespertilionidae) from northeastern Brazil. Zootaxa 4048: 412–427.

Felix, S., R.L.M. Novaes, R. de F. Souza and L. dos S. Avilla. 2016. Bat assemblage in a karstic area from northern Brazil: seven new occurrences for Tocantins state, including the first record of *Glyphonycteris sylvestris* Thomas, 1896 for the Cerrado. Check List 12: 1999.

Fenton, M.B., J.O. Whitaker Jr., M.J. Vonhof, W.A. Pedro, L.M. de S. Aguiar, J.E. Baumgarten, S. Bouchard, D.M. Faria, C. V. Portfors, N.I.L. Rauntenbach, W. Scully and M. Zortéa. 1999. The diet of bats from southeastern Brazil: the relation to echolocation and foraging behaviour. Rev. Bras. Zool. 16: 1081–1085.

Ferreira, A.P., D. de C. Melo and A. Loures-Ribeiro. 2013. *Diclidurus albus* Wied-Neuwied, 1820 (Chiroptera: Emballonuridae): First record of the species in the state of Paraíba, Brazil. Check List 9: 793–796.

Fracasso, M.P. de A., M.G. Beltrão and L.C.S. Lopez. 2010. Primeiro registro de *Histiotus velatus* (I. Geoffroy, 1824) para o Estado da Paraíba, Brasil. V Encontro Brasileiro Para o Estudo de Quirópteros 134–136.

Garbino, G.S.T. 2016. Research on bats (Chiroptera) from the state of São Paulo, southeastern Brazil: annotated species list and bibliographic review. Arq. Zool. 47: 43–128.

Gardner, A.L. 2008. Family Vespertilionidae Gray, 1821; p. 440–484. *In* A. L. Gardner (ed.), Mammals of South America. Marsupials, Xenarthrans, Shrews, and Bats. Volume 1. The University of Chicago Press.

Gardner, A.L., R.K. LaVal and D.E. Wilson. 1970. The Distributional Status of Some Costa Rican Bats. J. Mammal. 51: 712–729.

Garnham, P.C.C., R. Lainson and J.J. Shaw. 1971. A contribution to the study of the haematozoon parasites of bats. A new mammalian haemoproteid, *Polychromophilus deanei* n. sp. Mem. Inst. Oswaldo Cruz 69: 119–125.

Geoffroy Saint-Hilaire, I. 1824. Sur les Vespertilions du Brésil. Ann. des Sci. Nat. 3: 440–447.

Goodwin, G.G. 1942. Mammals of Honduras. Bull. Am. Mus. Nat. Hist. 79: 107–195.

Goodwin, G.G. 1946. Mammals of Costa Rica. Bull. Am. Mus. Nat. Hist. 87: 271–474.

Graciolli, G. 2004. Nycteribiidae (Diptera, Hippoboscoidea) no Sul do Brasil. Rev. Bras. Zool. 21: 971–985.

Graciolli, G. and C.J.B. Carvalho. 2001. Moscas ectoparasitas (Diptera, Hippoboscoidea) de morcegos (Mammalia, Chiroptera) do Estado do Paraná. II. Streblidae. Chave pictórica para gêneros e espécies. Rev. Bras. Zool. 18: 907–960.

Greenbaum, I.F. and J. Knox Jones. 1978. Noteworthy records of bats from El Salvador, Honduras, and Nicaragua. Occasional Papers of the Museum Texas Tech University 55: 1–7.

Greenhall, A.M. 1963. Use of mist nets and strychnine for vampire control in Trinidad. J. Mammal. 44: 396–399.

Gregorin, R., E. Gonçalves, C.C. Aires and A.P. Carmignotto. 2011. Morcegos (Mammalia: Chiroptera) da Estação Ecológica Serra Geral do Tocantins: composição específica e considerações taxonômicas. Biota Neotrop. 11: 299–311.

Gregorin, R. and R.V. Rossi. 2005. *Glyphonycteris daviesi* (Hill, 1964), a rare Central American and Amazonian bat recorded for eastern Brazilian Atlantic Forest (Chiroptera, Phyllostomidae). Mammalia 69: 427–430.

Griffiths, T.A. and A.L. Gardner. 2008. Subfamily Glossophaginae Bonaparte, 1845; p. 224–244. *In* A. L. Gardner (ed.), Mammals of South America. Marsupials, Xenarthrans, Shrews, and Bats. Volume 1. The University of Chicago Press.

Guzmán-Soriano, D., J.A. Vargas-Contreras, J.D. Cú-Vizcarra, G. Escalona Segura, Ó.G. Retana Guiascón, A. González Christen, J.A. Benítez Torres, J. Arroyo-Cabrales, J.C. Puc Cabrera and E. Victoria Chán. 2013. Registros notables de mamíferos para Campeche, México. Acta Zool. Mex. (n.S.) 29: 269–286.

Handley Jr., C.O. 1967. Bats of the canopy of an Amazonian forest. Atas Do Simpósio Sôbre a Biota Amazônica 5: 211–215.

Handley Jr., C.O. 1976. Mammals of the Smithsonian Venezuelan Project. Brigh. Young Univ. Sci. Bull., Biological Series 20: 1–91.

Hernández-Betancourt, S., V. Sánchez-Cordero, J. Sosa-Escalante and A.S. Castillo. 1996. Lista anotada de los mamíferos terrestres de la Reserva de Dzilam, Yucatán, México. UNAM 8: 1–39.

Herrera, H.M., F.L. Rocha, C.V. Lisboa, V. Rademaker, G.M. Mourão and A.M. Jansen. 2011. Food web connections and the transmission cycles of *Trypanosoma cruzi* and *Trypanosoma evansi* (Kinetoplastida, Trypanosomatidae) in the Pantanal Region, Brazil. T. Roy. Soc. Trop. Med. H. 105: 380–387.

Hill, J.E. 1965. Notes on bats from British Guiana, with the description of a new genus and species of Phyllostomidae. Mammalia 28: 553–572.

Hood, C.S. and A.L. Gardner. 2008. Family Emballonuridae Gervais, 1856; p. 188–207. *In* A. L. Gardner (ed.), Mammals of South America. Marsupials, Xenarthrans, Shrews, and Bats. Volume 1. The University of Chicago Press.

Hoppe, J.P.M., G. Marchezi and A.D. Ditchfield. 2019. First record of the White-winged Vampire bat, *Diaemus youngii* (Jentink, 1893) (Chiroptera, Phyllostomidae) for the state of Goiás, Brazil, with a revised distribution map. Check List 15: 55–64.

Hutterer, R., M. Verhaagh, J. Diller and R. Podloucky. 1995. An Inventory of Mammals Observed at Panguana Biological Station, Amazonian Peru. Ecotropica 1: 3–20.

Jentink, F.A. 1893. On a collection of bats from the West-Indies. Notes from the Leyden Museum 15: 278–283.

Jones, J.K. 2007. Bats from Western and Southern Mexico. Trans. Kans. Acad. Sci. (1903-) 67: 509.

Jones, J.K., J.D. Smith and H.H. Genoways. 1973. Annotated checklist of mammals of the Yucatan Peninsula, Mexico. I. Chiroptera. Occas. pap., Mus Tex. Tech. Univ. 13: 1–31.

Kalko, E.K. V. and C.O. Handley Jr. 2001. Neotropical bats in the canopy: diversity, community structure, and implications for conservation. Plant Ecol. 153: 319–333.

Kwon, M. and A.L. Gardner. 2008. Subfamily Desmodontinae J. A. Wagner, 1840; p. 218–224. *In* A. L. Gardner (ed.), Mammals of South America. Marsupials, Xenarthrans, Shrews, and Bats. Volume 1. The University of Chicago Press.

Laurindo, R. de S., R.L.M. Novaes, R. de F. Souza, V.F. Souza, F. Felix, T.M. Souto, R.G.T. Cunha and R. Gregorin. 2017. Mammals in forest remnants of an ecotonal Atlantic Forest-Cerrado area from southeastern Brazil. Neotrop. Biol. Conserv. 12: 19–29.

Lessa, L.G., B.M. de A. Costa, D.M. Rossoni, V. da C. Tavares, L.G. Dias, E.A. Moraes Júnior and J. de A. Silva. 2008. Mamíferos da Cadeia do Espinhaço: riqueza, ameaças e estratégias para conservação. Megadiversidade 4: 218–232.

Lima, J.L. 1926. Os morcegos da colecção do Museu Paulista. Rev. Mus. Paul. 14: 43–127.

López-González, C., S.J. Presley, R.D. Owen, M.R. Willig and I.G. Fox. 1998. Noteworthy records of bats (Chiroptera) from Paraguay. Mastozool. Neotrop. 5: 41–45.

Louzada, N.S.V., A.C. do M. Lima, L.M. Pessôa, J.L.P. Cordeiro and L.F.B. Oliveira. 2015. New records of phyllostomid bats for the state of Mato Grosso and the Cerrado of midwestern Brazil (Mammalia: Chiroptera). Check List 11: 1644.

Loza, J., J. Sunyer, F.A. Reid and J.G. Martinez-Fonseca. 2018. First capture of *Diclidurus albus* Wied-Neuwied, 1820 (Mammalia, Chiroptera, Emballonuridae) from Nicaragua. Check List 14: 1021–1025.

Mangolin, R., A.G. Motta, C.E.L. Esbérard and H. de G. Bergallo. 2007. Novos registros de *Lophostoma brasiliensis* Peters para o sudeste do Brasil (Mammalia, Chiroptera, Phyllostomidae). Rev. Bras. Zoo. 9: 225–228.

Mares, M.A., M.R. Willig, K.E. Streilein and T.E. Lacher. 1981. The mammals of northeastern Brazil: A preliminary assessment. Ann. Carnegie Mus. 50: 81–137.

Marques, J.T., M.J.R. Pereira and J.M. Palmeirim. 2016. Patterns in the use of rainforest vertical space by Neotropical aerial insectivorous bats: All the action is up in the canopy. Ecography 39: 476–486.

Marques-Aguiar, S.A., G.F. de S. Aguiar, N. Saldanha, M.M.B. Rocha, R.T.D.A. Fonseca and V.O. Reis-Filho. 2009. Diversidade de morcegos (Mammalia: Chiroptera) no Baixo Rio Xingu, estado do Pará. Anais Do IX Congresso de Ecologia Do Brasil 1–4.

Marques-Aguiar, S.A., M. V. Del Aguila, G.F. de S. Aguiar, N. Saldanha, J. de S. Silva-Junior and M.M.B. Rocha. 2003. Caracterização e perspectivas de estudo dos quirópteros da Estação Científica Ferreira Penna, município de Melgaço, Pará. Estação Científica Ferreira Penna - Dez Anos de Pesquisa Na Amazônia 1–3.

Marques-Aguiar, S.A., C.C.S. Melo, G.F. de S. Aguiar and J.A.L. Queiroz. 2002. Levantamento preliminar da mastofauna da região de Anajás-Muaná, Ilha de Marajó, Pará, Brasil. Rev. Bras. Zool. 19: 841–854.

Martins, A.C.M., E. Bernard and R. Gregorin. 2006. Inventários biológicos rápidos de morcegos (Mammalia, Chiroptera) em três unidades de conservação do Amapá, Brasil. Rev. Bras. Zool. 23: 1175–1184.

Martins, A.C.M., E. Bernard, R. Gregorin and W.A.S. Silva. 2011. Filling data gaps on the diversity and distribution of Amazonian bats (Chiroptera): the case of Amapá, easternmost Brazil. Zoologia 28: 177–185.

Martins, A.C.M., M.R. Willig, S.J. Presley and J.S. Marinho-Filho. 2017. Effects of forest height and vertical complexity on abundance and biodiversity of bats in Amazonia. Forest Ecol. Manag. 391: 427–435.

McBee, K., R.J. Baker and S.L. Pimm. 1985. Utility of morphological distance measures and clustering algorithms: a test using phyllostomid bats. Ann. Carnegie Mus. 54: 393–412.

McDonough, M.M., A.W. Ferguson, L.K. Ammerman, C. Granja-Vizcaino, S.F. Burneo and R.J. Baker. 2011. Molecular Verification of Bat Species Collected in Ecuador: Results of a Country-Wide Survey. Occas. pap., Mus Tex. Tech. Univ. 301: 1–28.

Menezes Jr., L.F., A.C. Duarte, M.D. Contildes and A.L. Peracchi. 2015. Comparação da quiropterofauna em área florestada e área aberta da RPPN Fazenda Bom Retiro, Rio de Janeiro, Brasil. Iheringia (Série Zoologia) 105: 271–275.

Miller, G.S. 1906. Twelve new genera of bats. Proceedings of the Biological Society of Washington 19: 83–86.

Miranda, J.M.D., M.F.M. Azevedo-Barros and F. de C. Passos. 2007. First record of *Histiotus laephotis* Thomas (Chiroptera, Vespertilionidae) from Brazil. Rev. Bras. Zool. 24: 1188–1191.

Miranda, J.M.D. and L. Zago. 2015. Assembleia de morcegos em remanescente de floresta ombrófilas mista no planalto de Guarapuava, Paraná, Brasil. Mastozool. Neotrop. 22: 55–62.

Miranda, J.M.D., L. Zago, F. Carvalho, M.B.G. Rubio and I.P. Bernardi. 2015. Morcegos (Mammalia: Chiroptera) da região do Médio Rio Teles Pires, sul da Amazônia, Brasil. Acta Amazon. 45: 89–100.

Miretzki, M. 2003. Morcegos do estado do Paraná, Brasil (Mammalia, Chiroptera): Riqueza de espécies, distribuição e síntese do conhecimento atual. Pap. Avulsos Zool. 43: 101–138.

Mok, W.Y. and L.A. Lacey. 1980. Algumas considerações ecológicas sobre morcegos vampiros na epidemiologia da raiva humana na Bacia Amazônica. Acta Amazon. 10: 335–342.

Morales-Martínez, D.M., M.A. Camacho and S.F. Burneo. 2018. Distribution and morphometric variation of *Micronycteris schmidtorum* (Sanborn, 1935) (Chiroptera: Phyllostomidae) in north South America with the first record from Ecuador. Mastozool. Neotrop. 25: 391–396.

Morales-Martínez, D.M. and A.F. Suárez-Castro. 2014. New records for *Glyphonycteris* Thomas, 1896 (Chiroptera: Phyllostomidae) from Colombia. Check List 10: 639–644.

Moras, L.M., L.F. de O. Bernardi, G. Graciolli and R. Gregorin. 2013. Bat flies (Diptera: Streblidae, Nycteribiidae) and mites (Acari) associated with bats (Mammalia: Chiroptera) in a high-altitude region in southern Minas Gerais, Brazil. Acta Parasitol. 58: 556–563.

Moscoso, P. and D.G. Tirira. 2009. Nuevos registros y comentarios sobre la distribución del murciélago blanco común *Diclidurus albus* (Chiroptera: Emballonuridae) en Ecuador. Mastozool. Neotrop. 16: 233–238.

Motta Jr., J.C. and V.A. Taddei. 1992. Bats as prey of Stygian Owls in southeastern Brazil. J. Raptor Res. 26: 259–260.

Muylaert, R.L., R.C. Teixeira, L. Hortenci, J.R. Estêvão, P.K. Rogeri and M.A.R. Mello. 2014. Bats (Mammalia: Chiroptera) in a Cerrado landscape in São Carlos, southeastern Brazil. Check List 10: 287–291.

Nascimento, M.C., R. Stumpp and G. Lessa. 2013. Bats (Mammalia: Chiroptera) of Mata do Paraíso research station, Viçosa, Minas Gerais, Brazil. Check List 9: 1406–1409.

Nogueira, M.R., A. Pol and A.L. Peracchi. 1999. New records of bats from Brazil with a list of additional species for the chiropteran fauna of the state of Acre, western Amazon basin. Mammalia 63: 363–368.

Nunes, A., S.A. Marques-Aguiar, L.N. Saldanha, R. Silva e Silva and A.M.R. Bezerra. 2005. New records on the geographic distribution of bat species in the Brazilian Amazonia. Mammalia 69: 109–115.

Olímpio, A.P.M., M.C. da S. Ventura, M. de J.O. Mascarenhas, D.C. Nascimento, F.A.G. Andrade, E. da C. Fraga and M.C. Barros. 2016. Bat fauna of the Cerrado savanna of eastern Maranhão, Brazil, with new species occurrences. Biota Neotrop. 16(3).

Oliveira, A.K.M., M.D. Oliveira, S. Favero and L.F. Oliveira. 2012. Diversity, similarity and trophic guild of chiropterofauna in three southern Pantanal sub-regions, state of Mato Grosso do Sul, Brazil. Acta Sci. Biol. Sci. 34: 33–39.

Oliveira, R. de N., S.P. Souza, R.S.V. Lobo, J.G. Castilho, C.I. Macedo, P. Carnieli, W. de O. Fahl, S.M. Achkar, K.C. Scheffer, I. Kotait, M.L. Carrieri and P.E. Brandão. 2010. Rabies virus in insectivorous bats: Implications of the diversity of the nucleoprotein and glycoprotein genes for molecular epidemiology. Virology 405: 352–360.

Oliveira, S.V., J.T.S. Lopes and E.P. Caldas. 2013. Eco-Epidemiological Surveillance of Rabies: Note About Examined Chiroptera in Southern Brazil. Cad. Pesqui. 24: 26–30.

Osgood, W.H. 1912. Mammals from western Venezuela and eastern Colombia. Fieldiana: Zoology 10: 33–66.

Owen, J.G., R.J. Baker and J.K. Jones. 1990. First record of *Peromyscus gymnotis* (Muridae) from El Salvador, with second records for *Choeroniscus godmani* and *Diaemus youngi* (Phyllostomidae). Texas J. Sci. 42: 417–418.

Pacheco, V., R. Cadenillas, S. Velazco, E. Salas and U. Fajardo. 2007. Noteworthy bat records from the Pacific Tropical rainforest region and adjacent dry forest in northwestern Peru. Acta Chiropterol. 9: 409–422.

Paradiso, J.L., G.G. Goodwin and A.M. Greenhall. 2006. A Review of the Bats of Trinidad and Tobago: Descriptions, Rabies Infection, and Ecology. J. Mammal. 42: 559.

Patterson, B.D. 1992. Mammals in the Royal Natural History Museum, Stockholm, Collected in Brazil and Bolivia by A. M. Olalla during 1934-1938. Fieldiana: Zoology (New Series) 66: 1–48.

Pedro, W.A., M.P. Geraldes, G.G. Lopez and C.J.R. Alho. 1995. Fragmentação de hábitat e a estrutura de uma taxocenose de morcegos em São Paulo (Brasil). Chiroptera Neotropical 1: 4–6.

Pedro, W.A., F. de C. Passos and B.K. Lim. 2001. Morcegos (Chiroptera; Mammalia) da Estação Ecológica dos Caetetus, estado de São Paulo. Chiroptera Neotropical 7: 136–140.

Pedroso, M.A., P.A. Rocha, M. V. Brandão, G.S.T. Garbino, C.O. Moraes and C.C. Aires. 2018. Filling gaps in the distribution of the white-winged vampire bat, *Diaemus Youngii* (Phyllostomidae, desmodontinae): New records for Southern Amazonia. Acta Amazon. 48: 154–157.

Pelzeln, A. 1883. Brasilische Säugethiere Resultate von Johann Natterer’s Reisen in Den Jahren 1817 Bis 1835. 1–140 p.

Peracchi, A.L. 1968. Sobre os hábitos de *Histiotus velatus* (Geoffroy, 1824) (Chiroptera, Vespertilionidae). Rev. Bras. Biol. 28: 469–473.

Peracchi, A.L. and S.T. Albuquerque. 1971. Lista provisória dos quirópteros dos Estados do Rio de Janeiro e Guanabara, Brasil (Mammalia, Chiroptera). Rev. Bras. Biol. 31: 405–413.

Peracchi, A.L. and S.T. Albuquerque. 1986. Quirópteros do estado do Rio de Janeiro, Brasil (Mammalia, Chiroptera). Publicações Avulsas do Museu Nacional 66: 63–69.

Peracchi, A.L., S.D.L. Raimundo and A.M. Tannure. 1984. Quirópteros do Território Federal do Amapá, Brasil (Mammalia, Chiroptera). Arquivos da Universidade Federal Rural do Rio de Janeiro 7: 89–100.

Pereira, M.J.R., J.T. Marques, J. Santana, C.D. Santos, J. Valsecchi, H.L. de Queiroz, P. Beja and J.M. Palmeirim. 2009. Structuring of Amazonian bat assemblages: The roles of flooding patterns and floodwater nutrient load. J. Anim. Ecol. 78: 1163–1171.

Pereira, S.N., D. Dias, I.P. Lima, A.C.S. Maas, M.A. Martins, D.P. Bolzan, D.S. França, M.B. Oliveira, A.L. Peracchi and M.F.S. Ferreira. 2013. Mamíferos de um fragmento florestal em Volta Redonda, estado do Rio de Janeiro. Bioscience Journal 29: 1017–1027.

Perini, F.A., V. da C. Tavares and C.M.D. Nascimento. 2003. Bats from the city of Belo Horizonte, Minas Gerais, southeastern Brazil. Chiroptera Neotropical 9: 169–173.

Peters, S.L., J.R. Malcolm and B.L. Zimmerman. 2006. Effects of selective logging on bat communities in the southeastern Amazon. Conserv. Biol. 20: 1410–1421.

Peterson, B. V. and T.C. Maa. 1970. One new and one previously unrecorded species of Basilia (Diptera: Nycteribiidae) from Uruguay. Can. Entomol. 102: 1480–1487.

Piccinini, R.S. 1974. Lista provisória dos quirópteros da coleção do Museu Paraense Emílio Goeldi (Chiroptera). Bo. Mus. Para. Emilio Goeldi (Zoologia) 77: 1–32.

Pine, R.H., R.K. LaVal, D.C. Carter and W.Y. Mok. 1996. Notes on the graybeard bat, *Micronycteris daviesi* (Hill) (Mammalia: Chiroptera: Phyllstomidae), with the first records from Ecuador and Brazil. Contributions in Mammalogy: A Memorial Volume in Honor of J. Knox Jones, Jr. 183–190.

Pinto, A.S. and D.N. Bento. 1986. *Trypanosoma cruzi*-like bloodstream trypomastigotes in bats from the State of Piauí, Northeastern Brazil. Rev. Soc. Bras. Med. Trop. 19: 31–34.

Pinto, C.M., J.P. Carrera, H. Mantilla-Meluk and R.J. Baker. 2007. Mammalia, Chiroptera, Phyllostomidae, *Diaemus youngi*: First confirmed record for Ecuador and observations of its presence in museum collections. Check List 3: 244–247.

Pira, A. 1904. Über fledermäuse von São Paulo. Zool. Anz. 28: 12–19.

Pires, D.P. de S. and M.E. Fabián. 2013. Diversidade, riqueza e estratificação vertical de espécies de morcegos em um remanescente de Mata Atlântica no Sul do Brasil. Biotemas 26: 121–131.

Porter, C.A., S.R. Hoofer, C.A. Cline, F.G. Hoffmann and R.J. Baker. 2007. Molecular Phylogenetics of the phyllostomid Bat Genus *Micronycteris* with Descriptions of Two New Subgenera. J. Mammal. 88: 1205–1215.

Quintela, F.M., C. Ibarra, S.V. Oliveira, I.G. Medvedovisky, F. Correa, D. Gianuca, A. Gava and S.M. Pacheco. 2011. Mammalia, Chiroptera, Rio Grande, state of Rio Grande do Sul, Brazil. Check List 7: 443–447.

Reis, N.R., M.L. da S. Barbieri, I.P. Lima and A.L. Peracchi. 2003. O que é melhor para manter a riqueza de espécies de morcegos (Mammalia, Chiroptera): um fragmento florestal grande ou vários fragmentos de pequeno tamanho? Rev. Bras. Zool. 20: 225–230.

Reis, N.R. and J.-L. Guillaumet. 1983. Les chauves-souris frugivores de la région de Manaus et leur rôle dans la dissémination des espèces végétales. Rev. Ecol.-Terre Vie 38: 147–169.

Reis, N.R., M.F. Müller, E.S. Soares and A.L. Peracchi. 1993. Lista e chave dos quirópteros do Parque Estadual Mata dos Godoy e arredores, Londrina, PR. ‎Semina cienc. biol. saude 14: 120–126.

Reis, N.R. and A.L. Peracchi. 1987. Quirópteros da região de Manaus, Amazonas, Brasil (Mammalia, Chiroptera). Bo. Mus. Para. Emilio Goeldi (Zoologia) 3: 1–21.

Reis, N.R., A.L. Peracchi and I.P. Lima. 2002. Morcegos da Bacia do Rio Tibagi; p. 251–270. *In* M. E. Medri, E. Bianchini, O. A. Shibatta, and J. A. Pimenta (eds.), A bacia do rio Tibagi. Londrina.

Reis, N.R., A.L. Peracchi, I.P. Lima, M.L. Sekiama and V.J. Rocha. 1998. Updated list of the chiropterians of the city of Londrina, Paraná, Brazil. Chiroptera Neotropical 4: 96–98.

Reis, N.R., A.L. Peracchi and M.L. Sekiama. 1999. Morcegos da Fazenda Monte Alegre, Telêmaco Borba, Paraná (Mammalia, Chiroptera). Rev. Bras. Zool. 16: 501–505.

Reis, N.R. and H.O.R. Schubart. 1979. Notas preliminares sobre os morcegos do Parque Nacional da Amazônia (Médio Tapajós). Acta Amazon. 9: 507–515.

Rocha, P.A., F.A.M. Soares, D. Dias, J.S. Mikalauskas, A. Feijó, E.M. Vilar and M.R. de M. Daher. 2017. New records of *Micronycteris schmidtorum* Sanborn, 1935 (Phyllostomidae, Chiroptera) for northeastern Brazil. Mastozool. Neotrop. 24: 475–482.

Ruschi, A. 1953. Família Emballonuridae: Descrição das espécies: *Rhynchiscus naso* e *Diclidurus albus albus*, com algumas observações a respeito. Bol. Mus. Biol. Mello Leitão (Zoologia) 12: 1–13.

Sampaio, E.M., E.K. V. Kalko, E. Bernard, B. Rodríguez-Herrera and C.O. Handley Jr. 2003. A biodiversity assessment of bats (Chiroptera) in a tropical lowland rainforest of Central Amazonia, including methodological and conservation considerations. Stud. Neotrop. Fauna E. 38: 17–31.

Sanborn, C.C. 1949. Mammals from the Rio Ucayali, Peru. J. Mammal. 30: 277–288.

Sanborn, C.C. 1935. New mammals from Guatemala and Honduras. Field Mus. Nat. Hist. (Zoological Series) 20: 81–85.

Sá-Neto, R.J. and J.S. Marinho-Filho. 2013. Bats in fragments of xeric woodland Caatinga in Brazilian semiarid. J. Arid Environ. 90: 88–94.

Sazima, I. and W. Uieda. 1980. Feeding Behavior of the White-Winged Vampire Bat, *Diaemus youngii*, on Poultry. J. Mammal. 61: 102–104.

Schaller, G.B. 1983. Mammals and their biomass on a Brazilian Ranch. Arq. Zool. 31: 1–36.

Sekiama, M.L., N.R. Reis, A.L. Peracchi and V.J. Rocha. 2001. Morcegos do Parque Nacional do Iguaçu, Paraná (Chiroptera, Mammalia). Rev. Bras. Zool. 18: 749–754.

Silva, L.A.M., A.Q.S. Souza, A.S. Lima, C.S.F. Araújo, C.V.M. Silva, L.E.C. Silva, M.F. Gomes, P.L. Queiroz and R.M. Silva. 2010. Morcegos da Reserva Particular do Patrimônio Natural Frei Caneca, nordeste do Brasil. Chiroptera Neotropical 16: 87–90.

Silva, M.M.S., N.M.S. Harmani, E.F.B. Gonçalves and W. Uieda. 1996. Bats from the metropolitan region of São Paulo, Southeastern Brazil. Chiroptera Neotropical 2: 39–41.

Simmons, N.B. 1996. A New Species of *Micronycteris* (Chiroptera: Phyllostomidae) from Northeastern Brazil, with Comments on Phylogenetic relationships. Am. Mus. Novit. 3158: 1–34.

Simmons, N.B. and R.S. Voss. 1998. The mammals of Paracou, French Guiana: a Neotropical lowland rainforest fauna. Part 1. Bats. Bull. Am. Mus. Nat. Hist. 237: 1–219.

Sotero-Caio, C.G., J.C. Pieczarka, C.Y. Nagamachi, A.J.B. Gomes, T.C. Lira, P.C.M. O’Brien, M.A. Ferguson-Smith, M.J. Souza and N. Santos. 2011. Chromosomal homologies among vampire bats revealed by chromosome painting (Phyllostomidae, Chiroptera). Cytogenet. Genome Res. 132: 156–164.

Sousa, M.A.N., A. Langguth and E. do A. Gimenez. 2004. Mamíferos dos brejos de altitude Paraíba e Pernambuco; p. 229–254. *In* K. C. Porto, J. J. P. Cabral, and M. Tabarelli (eds.), Brejos de altitude em Pernambuco e Paraíba: história natural, ecologia e conservação. Ministério do Meio Ambiente.

Souza, L.C., H. Langoni, R.C. Silva and S.B. Lucheis. 2005. Vigilância epidemiológica da raiva na região de Botucatu-SP: Importância dos quirópteros na manutenção do vírus na natureza. Ars Vet. 21: 62–68.

Stallings, J.R., G.A.B. Fonseca, L.P. de S. Pinto, L.M. de S. Aguiar and E.L. Sábato. 1991. Mamíferos do Parque Florestal Estadual do Rio Doce, Minas Gerais, Brasil. Rev. Bras. Zool. 7: 663–677.

Stutz, W.H., M.C. Albuquerque, W. Uieda, E.M. Macedo and C.B. França. 2004. Updated list of bats from Uberlândia, state of Minas Gerais, Southeastern Brazil. Chiroptera Neotropical 10: 188–190.

Talamoni, S.A., B.D. Amaro, D.A. Cordeiro-Júnior and C.E.M.A. Maciel. 2014. Mammals of Reserva Particular do Patrimônio Natural Santuário do Caraça, state of Minas Gerais, Brazil. Check List 10: 1005–1013.

Talamoni, S.A., D.C. Coelho, L.H. Dias-Silva and A.S. Amaral. 2013. Bat assemblages in conservation areas of a metropolitan region in southeastern Brazil, including an important karst habitat. Braz. J. Biol. 73: 309–319.

Tamsitt, J.R., D. Valdivieso and J. Hernández C. 1965. Additional records of *Choeronicus* in Colombia. J. Mammal. 46: 704.

Tapia-Ramírez, G., C. López-González, D.F. García-Mendoza, J.F. Charre-Medellín and T.C. Monterrubio-Rico. 2013. Registros notables de mamíferos (Mammalia) para los estados de Durango y Nayarit, México. Acta Zool. Mex. (N.S.) 29: 423–427.

Tavares, V. da C., L.M. de S. Aguiar, F.A. Perini, F. de C. Falcão and R. Gregorin. 2010. Bats of the state of Minas Gerais, southeastern Brasil. Chiroptera Neotropical 16: 675–705.

Tavares, V. da C., C.F. de S. Palmuti, R. Gregorin and T.T. Dornas. 2012. Morcegos; p. 162–179. *In* F. D. Martins, A. F. Castilho, J. Campos, F. M. Hatano, and S. G. Rolim (eds.), Fauna da Floresta Nacional de Carajás - Estudos sobre Vertebrados Terrestres. Nitro.

Tavares, V. da C., F.A. Perini and J.A. Lombardi. 2007. The bat communities (Chiroptera) of the Parque Estadual do Rio Doce, a large remnant of Atlantic Forest in southeastern Brazil. Lundiana 8: 35–47.

Thomas, O. 1928. The Godman-Thomas expedition to Peru - VIII. On mammals obtained by Mr. Hendee at Pebas and Iquitos, Upper Amazons. Ann. Mag. Nat. Hist.: Series 10, 2: 285–294

Thomas, O. 1896. On new small mammals from the Neotropical Region. Ann. Mag. Nat. Hist.: Series 6, 18: 301–314.

Thomas, O. 1899. List of the mammals obtained by Dr. G. Franco Grillo in the province of Parana, Brazil. Ann. Mus. civ. stor. nat. Di Genova 20: 546–549.

Thomas, O. 1912. New bats and rodents from S. America. Ann. Mag. Nat. Hist.: Series 8 10: 403–411.

Thomas, O. 1916. Notes on bats of the genus Histiotus. Ann. Mag. Nat. Hist.: Series 8 17: 272–276.

Tirira, D.G., M.A. Camacho, N. Tinoco, M.F. Solórzano and S.F. Burneo. 2016. Genus *Glyphonycteris* Thomas, 1896 (Mammalia: Chiroptera) in Ecuador: first confirmed record of *G. sylvestris* Thomas, 1896 and a geographical review to *G. daviesi* (Hill, 1965). Check List 12: 1965.

Torquetti, C.G., M.A.C. Assis, S.S.A. Carmo and S.A. Talamoni. 2013. Observations of a diurnal roost of the white-winged vampire bat *Diaemus youngi* in a karstic area of southeastern Brazil. Chiroptera Neotropical 19: 1147–1150.

Trajano, E. 1982. New records of bats from southeastern Brazil. J. Mammal. 63: 529.

Trajano, E. 1987. Fauna cavernícola brasileira: composição e caracterização preliminar. Rev. Bras. Zool. 3: 533–561.

Tuttle, M.D. 1970. Distribution and zoogeography of Peruvian bats, with comments on Natural History. Univ. Kans, Sci. Bull. 49: 45–86.

Uieda, W. and M.E. Chaves. 2005. Bats From Botucatu Region, State of São Paulo, Southeastern Brazil. Chiroptera Neotropical 11: 224–226.

Urbano-Vidales, G., O. Sánchez-Herrera, G. Téllez-Girón and R.A. Medellín L. 1987. Additional Records of Mexican Mammals. Southwest Nat. 32: 134–137.

Urbieta, G.L., T.Y.S. Siqueira and G. Graciolli. 2017. White-winged Vampire Bat, *Diaemus youngi* (Jentink, 1893) (Mammalia, Chiroptera): range extension in the Cerrado biome and new locality in Mato Grosso do Sul, southwestern Brazil. Check List 13: 2128.

Valdivieso, D. 1964. La fauna quiróptera del Departamento de Cundinamarca, Colombia. Rev. Biol. Trop. 12: 19–45.

Valle, L.G.E., H.F. Vogel, B.M. Sugayama, R. Metri, J. Gazarini and C.H. Zawadzki. 2011. Mamíferos de Guarapuava, Paraná, Brasil. Rev. Bras. Zoo. 13: 151–162.

Vargas-Contreras, J.A., J.R. Herrera-Herrera and J.E. Escobedo-Cabrera. 2004. Noteworthy records of mammals from Campeche, Mexico. RMM 61–69.

Vargas-Mena, J.C., K. Alves-Pereira, M.A.S. Barros, E. Barbier, E. Cordero-Schmidt, S.M.Q. Lima, B. Rodríguez-Herrera and E.M. Venticinque. 2018. The bats of Rio Grande do Norte state, northeastern Brazil. Biota Neotrop. 18 (2)

Vaz, S.M. 2005. Mamíferos colecionados pelo Serviço de Estudos e Pesquisas sobre a Febre Amarela nos municípios de Ilhéus e Buerarema, Estado da Bahia, Brasil. Arch. Mus. Nac. 63: 21–28.

Velazco, P.M., C.C. Aires, A.P. Carmignotto and A.M.R. Bezerra. 2010. Mammalia, Chiroptera, Phyllostomidae, *Vampyrodes caraccioli* (Thomas, 1889): Range extension and revised distribution map. Check List 6: 49–51.

Vieira, C.O. da C. 1942. Ensaio monográfico sobre os quirópteros do Brasil. Arq. Zool. 3: 219–471.

Vieira, C.O. da C. 1955. Lista remissiva dos mamíferos do Brasil. Arq. Zool. 8: 341–464.

Voss, R.S. and L.H. Emmons. 1996. Mammalian Diversity in Neotropical Lowland Rainforests: a Preliminary Assessment. Bull. Am. Mus. Nat. Hist. 230: 1–115.

Wallauer, J.P., M. Becker, L.G. Marins-Sá, L.M. Lermann, S.H. Perretto and V. Schermack. 2000. Levantamento dos mamíferos da Floresta Nacional de Três Barras - Santa Catarina. Biotemas 13: 103–127.

Wenzel, R.L., V.J. Tipton and A. Kiewlicz. 1966. The streblid batflies of Panama (Diptera Calypterae: Streblidae). Fieldiana: Special Publications 9: 405–675.

Wied-Neuwied, P.M. 1820. *Diclidurus* Klappen-schwanz. Ein neues genus der Chiropteren aus Brasilien. Isis Oder Encyclopädische Zeitung von Oken 4: 1629–1630.

Williams, S.L. and H.H. Genoways. 1980. Results of the Alcoa Foundation-Suriname Expeditions. II. Additional records of bats (Mammalia: Chiroptera) from Suriname. Ann. Carnegie Mus. 49: 213–236.

Willig, M.R. 1983. Composition, microgeographic variation, and sexual dimorphism in Caatingas and Cerrado bat communities from northeast Brazil. Bull. Carnegie Mus. Nat. Hist. 23: 1–131.

Winge, H. 1892. Jordfundne og nulevende Flagermus (Chiroptera) fra Lagoa Santa, Minas Geraes, Brasilien: med udsigt over Flagermusenes indbyrdes Slaegtskab. E Museo Lundii 2: 1–92.

Xavier, B. da S., W.D. Carvalho, D. Dias, L. de O. Tabosa, C.E.L. Santos and C.E.L. Esbérard. 2018. Bat richness (Mammalia: Chiroptera) in an area of montane Atlantic Forest in the Serra da Mantiqueira, state of Minas Gerais, southeast Brazil. Biota Neotrop. 18 (2)

Zanon, C.M.V. and N.R. Reis. 2007. Bats (Mammalia, Chiroptera) in the Ponta Grossa region, Campos Gerais, Paraná, Brazil. Rev. Bras. Zool. 24: 327–332.
